# Supplementary material
Source: Springer Nature journal article supplement (https://www.springermedizin.de/resource/supplementary/12906_2012_1064_MOESM1_ESM.pdf/9520360)

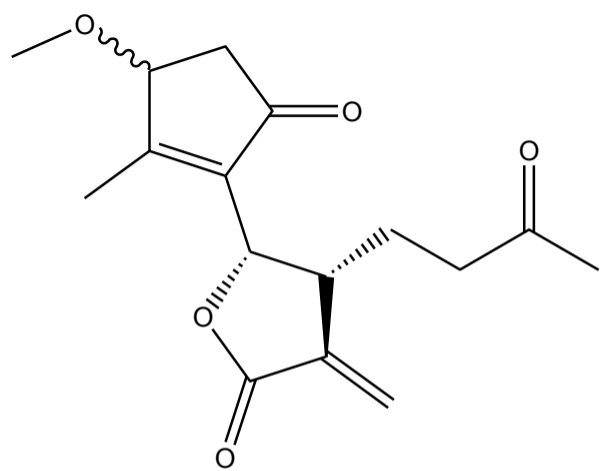

3- $\beta$ -methoxy-iso-seco-tanaparholide  
( $\beta$ -tan)

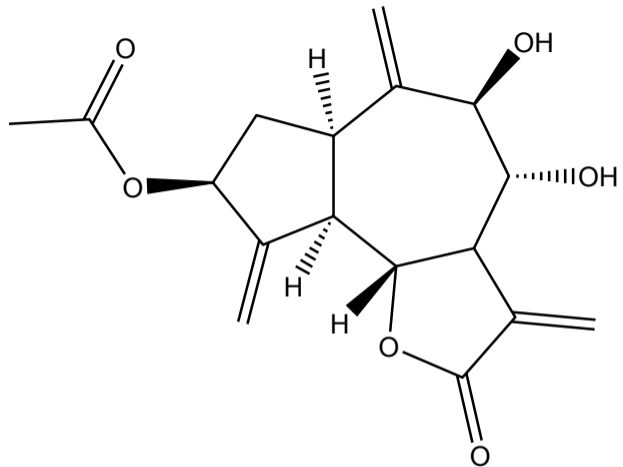

salograviolide A  
(Sal A)

Supplement: MOESM1 [file 9520360]
